# Supplementary material for: Root Transcriptional and Metabolic Dynamics Induced by the Plant Growth Promoting Rhizobacterium (PGPR) Bacillus subtilis Mbi600 on Cucumber Plants
Source: MDPI journal article supplement (doi:10.3390/plants11091218), 2022-04-30
Supplement: s1 [file s1]

**Table S1.** List of oligonucleotides designed and used in the study.

| <b>Gene ID</b>      | <b>Primer sequence (5' – 3')</b>              | <b>Encoding protein</b>                      | <b>Product size</b> |
|---------------------|-----------------------------------------------|----------------------------------------------|---------------------|
| <b>Csa_5G643380</b> | GGGCGGAGTCAAGAGAGCGT<br>TGCCACCACATCTGACCTGCT | endo-1,3(4)-beta-glucanase 3                 | 146                 |
| <b>Csa_2G010370</b> | GCCCTTGAATTGGCGAAACAC<br>TTCGACCTGATGGGCCGACG | pathogenesis-related protein<br>PR-4         | 68                  |
| <b>Csa_2G406640</b> | AGACGCCGAGAAGGACGCTC<br>TCGGCGCAAGAGACTCGACC  | peroxidase                                   | 117                 |
| <b>Csa_3G743950</b> | TTAACGAGCGGTCCAGGCCA<br>ACCGCAATCGCCAGTCATGC  | thaumatin-like                               | 165                 |
| <b>Csa_2G011420</b> | AGAGCTTTGCCCTCCGACGA<br>GGCCACCCCACTTGTGC     | auxin-responsive protein IAA4                | 119                 |
| <b>Csa_7G007930</b> | ACAACATCCGCCGCATCGTG<br>CGCGGTCACTCGAGCCTTCT  | indole-3-acetic acid-induced<br>protein ARG7 | 71                  |
| <b>Csa_3G866530</b> | ATCCCTTCCGACGTACCCGC<br>GACTCGTCGCAAGGGATTGCC | auxin-responsive 6B                          | 176                 |
| <b>Csa_3G035310</b> | ACCGGGTTCGCTCTACACCG<br>CGCCTGCAGCAATTTCCGGA  | auxin-responsive protein<br>SAUR32           | 143                 |

**Table S2.** Gene Ontology (GO) enrichment results of up-regulated differentially expressed genes (DEGs) in *Bacillus subtilis* MBI600 (*Bs* MBI600) - treated cucumber roots. DEGs are categorized according to biological process and molecular function.

| Biological process |               |             |                                                                |                |               |             |                                                                | Molecular function |               |             |                                           |
|--------------------|---------------|-------------|----------------------------------------------------------------|----------------|---------------|-------------|----------------------------------------------------------------|--------------------|---------------|-------------|-------------------------------------------|
| 24 hours           |               |             |                                                                | 48 hours       |               |             |                                                                | 24 hours           |               |             |                                           |
| Enrichment FDR     | Genes in list | Total genes | Functional Category                                            | Enrichment FDR | Genes in list | Total genes | Functional Category                                            | Enrichment FDR     | Genes in list | Total genes | Functional Category                       |
| 8,90E-03           | 6             | 20          | Regulation of transmembrane transport                          | 2,20E-05       | 71            | 1247        | Regulation of macromolecule biosynthetic process               | 5,20E-04           | 69            | 1295        | DNA binding                               |
| 1,60E-02           | 57            | 1247        | Regulation of macromolecule biosynthetic process               | 2,20E-05       | 72            | 1234        | Regulation of nucleobase-containing compound metabolic process | 5,20E-04           | 35            | 496         | Transcription regulator activity          |
| 1,60E-02           | 3             | 7           | Amine transport                                                | 2,20E-05       | 110           | 2223        | Regulation of biological process                               | 6,80E-04           | 32            | 451         | DNA-binding transcription factor activity |
| 1,60E-02           | 59            | 1234        | Regulation of nucleobase-containing compound metabolic process | 2,20E-05       | 77            | 1389        | Regulation of nitrogen compound metabolic process              | 3,10E-03           | 100           | 2230        | Nucleic acid binding                      |
| 1,60E-02           | 58            | 1268        | Regulation of cellular biosynthetic process                    | 2,20E-05       | 70            | 1200        | Regulation of RNA metabolic process                            |                    |               |             |                                           |
| 1,60E-02           | 3             | 7           | Regulation of organic acid transport                           | 2,20E-05       | 69            | 1179        | Regulation of transcription, DNA-templated                     |                    |               |             |                                           |

|          |    |      |                                                     |          |    |      |                                                           |
|----------|----|------|-----------------------------------------------------|----------|----|------|-----------------------------------------------------------|
| 1,60E-02 | 3  | 7    | Amino acid export across plasma membrane            | 2,20E-05 | 69 | 1186 | Regulation of nucleic acid-templated transcription        |
| 1,60E-02 | 5  | 19   | Regulation of ion transmembrane transport           | 2,20E-05 | 71 | 1240 | Regulation of cellular macromolecule biosynthetic process |
| 1,60E-02 | 5  | 22   | Regulation of ion transport                         | 2,20E-05 | 69 | 1186 | Regulation of RNA biosynthetic process                    |
| 1,60E-02 | 4  | 10   | Regulation of anion transport                       | 2,90E-05 | 77 | 1407 | Regulation of primary metabolic process                   |
| 1,60E-02 | 8  | 62   | Negative regulation of transcription, DNA-templated | 3,30E-05 | 71 | 1268 | Regulation of cellular biosynthetic process               |
| 1,60E-02 | 6  | 37   | Regulation of transport                             | 3,30E-05 | 71 | 1271 | Regulation of biosynthetic process                        |
| 1,60E-02 | 57 | 1200 | Regulation of RNA metabolic process                 | 3,70E-05 | 71 | 1279 | Transcription, DNA-templated                              |
| 1,60E-02 | 3  | 7    | Regulation of amine transport                       | 3,70E-05 | 34 | 442  | Ion transport                                             |
| 1,60E-02 | 3  | 7    | Regulation of amino acid transport                  | 3,80E-05 | 72 | 1312 | Regulation of gene expression                             |
| 1,60E-02 | 55 | 1179 | Regulation of transcription, DNA-templated          | 3,80E-05 | 77 | 1445 | Regulation of cellular metabolic process                  |

|          |    |      |                                                                               |          |     |      |                                                     |
|----------|----|------|-------------------------------------------------------------------------------|----------|-----|------|-----------------------------------------------------|
| 1,60E-02 | 3  | 7    | Regulation of amino acid export                                               | 3,80E-05 | 71  | 1295 | RNA biosynthetic process                            |
| 1,60E-02 | 4  | 14   | Erythrose 4-phosphate/phosphoenolpyruvate family amino acid catabolic process | 3,80E-05 | 78  | 1470 | Regulation of macromolecule metabolic process       |
| 1,60E-02 | 8  | 68   | Negative regulation of RNA biosynthetic process                               | 3,80E-05 | 117 | 2478 | Biological regulation                               |
| 1,60E-02 | 56 | 1186 | Regulation of nucleic acid-templated transcription                            | 3,80E-05 | 71  | 1291 | Nucleic acid-templated transcription                |
| 1,60E-02 | 8  | 68   | Negative regulation of nucleic acid-templated transcription                   | 3,80E-05 | 26  | 293  | Cation transport                                    |
| 1,60E-02 | 3  | 7    | Regulation of amino acid transmembrane transport                              | 6,10E-05 | 19  | 178  | Metal ion transport                                 |
| 1,60E-02 | 4  | 9    | Regulation of anion transmembrane transport                                   | 1,00E-04 | 77  | 1488 | Nucleobase-containing compound biosynthetic process |
| 1,60E-02 | 56 | 1240 | Regulation of cellular macromolecule biosynthetic process                     | 1,10E-04 | 82  | 1622 | Heterocycle biosynthetic process                    |
| 1,60E-02 | 56 | 1186 | Regulation of RNA biosynthetic process                                        | 1,10E-04 | 97  | 2013 | Regulation of cellular process                      |
| 1,60E-02 | 4  | 14   | L-phenylalanine catabolic process                                             | 1,50E-04 | 84  | 1689 | Organic cyclic compound biosynthetic process        |

|          |    |      |                                                   |          |    |      |                                                 |
|----------|----|------|---------------------------------------------------|----------|----|------|-------------------------------------------------|
| 1,60E-02 | 58 | 1271 | Regulation of biosynthetic process                | 1,70E-04 | 78 | 1543 | Regulation of metabolic process                 |
| 1,60E-02 | 90 | 2223 | Regulation of biological process                  | 2,80E-04 | 80 | 1617 | Aromatic compound biosynthetic process          |
| 1,70E-02 | 61 | 1389 | Regulation of nitrogen compound metabolic process | 4,60E-03 | 91 | 2063 | Cellular nitrogen compound biosynthetic process |
| 1,70E-02 | 8  | 70   | Negative regulation of RNA metabolic process      | 7,30E-03 | 19 | 258  | Ion transmembrane transport                     |

**Table S3.** Gene Ontology (GO) enrichment results of down-regulated differentially expressed genes (DEGs) in *Bacillus subtilis* MBI600 (*Bs* MBI600) - treated cucumber roots. DEGs are categorized according to biological process and molecular function.

| Biological process |               |             |                                                                |                |               |             |                                                                               |
|--------------------|---------------|-------------|----------------------------------------------------------------|----------------|---------------|-------------|-------------------------------------------------------------------------------|
| 24 hours           |               |             |                                                                | 48 hours       |               |             |                                                                               |
| Enrichment FDR     | Genes in list | Total genes | Functional Category                                            | Enrichment FDR | Genes in list | Total genes | Functional Category                                                           |
| 1,20E-07           | 115           | 1247        | Regulation of macromolecule biosynthetic process               | 9,30E-06       | 7             | 14          | Erythrose 4-phosphate/phosphoenolpyruvate family amino acid catabolic process |
| 1,20E-07           | 114           | 1234        | Regulation of nucleobase-containing compound metabolic process | 9,30E-06       | 7             | 14          | L-phenylalanine catabolic process                                             |
| 1,20E-07           | 116           | 1268        | Regulation of cellular biosynthetic process                    | 3,30E-05       | 7             | 17          | Aromatic amino acid family catabolic process                                  |
| 1,20E-07           | 112           | 1200        | Regulation of RNA metabolic process                            | 9,90E-05       | 8             | 30          | Alpha-amino acid catabolic process                                            |
| 1,20E-07           | 111           | 1179        | Regulation of transcription, DNA-templated                     | 9,90E-05       | 7             | 21          | Erythrose 4-phosphate/phosphoenolpyruvate family amino acid metabolic process |
| 1,20E-07           | 112           | 1186        | Regulation of nucleic acid-templated transcription             | 9,90E-05       | 7             | 21          | L-phenylalanine metabolic process                                             |
| 1,20E-07           | 114           | 1240        | Regulation of cellular macromolecule biosynthetic process      | 1,30E-04       | 5             | 9           | Cinnamic acid biosynthetic process                                            |
| 1,20E-07           | 112           | 1186        | Regulation of RNA biosynthetic process                         | 1,30E-04       | 5             | 9           | Cinnamic acid metabolic process                                               |
| 1,20E-07           | 116           | 1271        | Regulation of biosynthetic process                             | 1,50E-04       | 8             | 33          | Cellular amino acid catabolic process                                         |
| 5,50E-07           | 269           | 3771        | Cellular macromolecule metabolic process                       | 1,70E-04       | 29            | 408         | Small molecule biosynthetic process                                           |

|          |     |      |                                                   |          |     |      |                                               |
|----------|-----|------|---------------------------------------------------|----------|-----|------|-----------------------------------------------|
| 8,40E-07 | 114 | 1291 | Nucleic acid-templated transcription              | 3,60E-04 | 116 | 2876 | Biosynthetic process                          |
| 8,50E-07 | 114 | 1295 | RNA biosynthetic process                          | 3,60E-04 | 10  | 63   | Aromatic amino acid family metabolic process  |
| 8,50E-07 | 113 | 1279 | Transcription, DNA-templated                      | 3,60E-04 | 48  | 904  | Small molecule metabolic process              |
| 1,60E-06 | 114 | 1312 | Regulation of gene expression                     | 3,60E-04 | 8   | 39   | Secondary metabolite biosynthetic process     |
| 4,20E-06 | 121 | 1445 | Regulation of cellular metabolic process          | 6,60E-04 | 10  | 69   | Small molecule catabolic process              |
| 4,80E-06 | 117 | 1389 | Regulation of nitrogen compound metabolic process | 8,50E-04 | 5   | 14   | Benzene-containing compound metabolic process |
| 5,00E-06 | 118 | 1407 | Regulation of primary metabolic process           | 8,50E-04 | 49  | 968  | Organonitrogen compound biosynthetic process  |
| 1,10E-05 | 155 | 2013 | Regulation of cellular process                    | 1,00E-03 | 109 | 2752 | Cellular biosynthetic process                 |
| 2,40E-05 | 119 | 1470 | Regulation of macromolecule metabolic process     | 1,20E-03 | 110 | 2796 | Organic substance biosynthetic process        |
| 2,40E-05 | 156 | 2060 | Macromolecule biosynthetic process                | 1,20E-03 | 29  | 471  | Peptide metabolic process                     |
| 2,70E-05 | 128 | 1617 | Aromatic compound biosynthetic process            | 1,30E-03 | 8   | 49   | Organic acid catabolic process                |
| 3,10E-05 | 123 | 1543 | Regulation of metabolic process                   | 1,30E-03 | 8   | 49   | Carboxylic acid catabolic process             |
| 3,40E-05 | 153 | 2028 | Cellular macromolecule biosynthetic process       | 1,30E-03 | 6   | 25   | Phenylpropanoid biosynthetic process          |
| 4,60E-05 | 164 | 2223 | Regulation of biological process                  | 1,40E-03 | 31  | 529  | Cellular amide metabolic process              |
| 4,60E-05 | 131 | 1689 | Organic cyclic compound biosynthetic process      | 1,50E-03 | 9   | 65   | Secondary metabolic process                   |

| 4,60E-05                  | 37            | 307         | Response to oxygen-containing compound                 | 1,50E-03        | 15            | 169         | Alpha-amino acid metabolic process             |
|---------------------------|---------------|-------------|--------------------------------------------------------|-----------------|---------------|-------------|------------------------------------------------|
| 4,60E-05                  | 77            | 856         | Protein phosphorylation                                | 2,20E-03        | 116           | 3055        | Organonitrogen compound metabolic process      |
| 4,70E-05                  | 15            | 69          | Response to fungus                                     | 2,30E-03        | 27            | 448         | Translation                                    |
| 4,90E-05                  | 12            | 45          | Response to wounding                                   | 2,70E-03        | 6             | 30          | Xyloglucan metabolic process                   |
| 5,70E-05                  | 7             | 14          | Benzene-containing compound metabolic process          | 2,70E-03        | 27            | 454         | Peptide biosynthetic process                   |
| <b>Molecular function</b> |               |             |                                                        |                 |               |             |                                                |
| <b>24 hours</b>           |               |             |                                                        | <b>48 hours</b> |               |             |                                                |
| Enrichment FDR            | Genes in list | Total genes | Functional Category                                    | Enrichment FDR  | Genes in list | Total genes | Functional Category                            |
| 3,80E-17                  | 75            | 451         | DNA-binding transcription factor activity              | 3,20E-06        | 8             | 19          | Ammonia-lyase activity                         |
| 3,80E-17                  | 79            | 496         | Transcription regulator activity                       | 2,80E-05        | 9             | 35          | Carbon-nitrogen lyase activity                 |
| 5,80E-09                  | 122           | 1295        | DNA binding                                            | 3,60E-05        | 28            | 356         | Structural molecule activity                   |
| 1,80E-06                  | 31            | 197         | Calcium ion binding                                    | 4,00E-05        | 25            | 301         | Structural constituent of ribosome             |
| 8,50E-06                  | 37            | 281         | Sequence-specific DNA binding                          | 6,50E-05        | 5             | 9           | Phenylalanine ammonia-lyase activity           |
| 6,90E-05                  | 75            | 828         | Protein kinase activity                                | 3,60E-04        | 20            | 242         | Lyase activity                                 |
| 7,60E-05                  | 8             | 19          | Ammonia-lyase activity                                 | 9,60E-04        | 6             | 24          | Cysteine-type endopeptidase inhibitor activity |
| 7,80E-05                  | 12            | 46          | Calmodulin binding                                     | 2,10E-03        | 6             | 28          | Xyloglucan:xyloglucosyl transferase activity   |
| 8,80E-05                  | 85            | 992         | Kinase activity                                        | 2,80E-02        | 9             | 97          | Magnesium ion binding                          |
| 2,60E-04                  | 79            | 932         | Phosphotransferase activity, alcohol group as acceptor | 2,80E-02        | 6             | 46          | Calmodulin binding                             |
| 4,00E-04                  | 297           | 4633        | Organic cyclic compound binding                        | 3,00E-02        | 6             | 49          | Endopeptidase inhibitor activity               |

|          |     |      |                                                                 |          |   |    |                                  |
|----------|-----|------|-----------------------------------------------------------------|----------|---|----|----------------------------------|
| 4,00E-04 | 297 | 4632 | Heterocyclic compound binding                                   | 3,00E-02 | 6 | 49 | Peptidase inhibitor activity     |
| 4,50E-04 | 158 | 2230 | Nucleic acid binding                                            | 3,00E-02 | 6 | 49 | Endopeptidase regulator activity |
| 5,80E-04 | 120 | 1614 | Catalytic activity, acting on a protein                         | 3,10E-02 | 6 | 50 | Peptidase regulator activity     |
| 6,10E-04 | 5   | 9    | Phenylalanine ammonia-lyase activity                            |          |   |    |                                  |
| 3,20E-03 | 87  | 1147 | Transferase activity, transferring phosphorus-containing groups |          |   |    |                                  |
| 4,70E-03 | 8   | 35   | Carbon-nitrogen lyase activity                                  |          |   |    |                                  |
| 5,80E-03 | 7   | 28   | Xyloglucan:xyloglucosyl transferase activity                    |          |   |    |                                  |
| 6,30E-03 | 157 | 2356 | Transferase activity                                            |          |   |    |                                  |
| 1,30E-02 | 13  | 94   | Glucosyltransferase activity                                    |          |   |    |                                  |
| 2,10E-02 | 27  | 285  | Protein serine/threonine kinase activity                        |          |   |    |                                  |
| 2,60E-02 | 10  | 68   | Aspartic-type endopeptidase activity                            |          |   |    |                                  |
| 2,60E-02 | 10  | 68   | Aspartic-type peptidase activity                                |          |   |    |                                  |
| 3,60E-02 | 14  | 120  | Ubiquitin-protein transferase activity                          |          |   |    |                                  |
| 3,70E-02 | 9   | 61   | Protein serine/threonine phosphatase activity                   |          |   |    |                                  |
| 4,50E-02 | 14  | 124  | Ubiquitin-like protein transferase activity                     |          |   |    |                                  |

**Table S4.** Metabolite amounts (means  $\pm$  SE) expressed as relative abundance based on the relative response compared to internal standard adonitol, 24 h post application of *Bacillus subtilis* MBI600 (*Bs* MBI600).

| Substance                        | Control           | <i>Bs</i> MBI600   |
|----------------------------------|-------------------|--------------------|
| <b>Water-soluble sugars</b>      |                   |                    |
| 4-Ketoglucose                    | 0.078 $\pm$ 0.015 | 0.095 $\pm$ 0.0001 |
| Ribofuranose                     | 0.159 $\pm$ 0.039 | 0.102 $\pm$ 0.0001 |
| Fructose                         | 0.626 $\pm$ 0.014 | 0.723 $\pm$ 0.062  |
| Sorbose                          | 0.560 $\pm$ 0.045 | 0.662 $\pm$ 0.049  |
| Glucose                          | 2.922 $\pm$ 0.470 | 3.538 $\pm$ 0.347  |
| Mannose                          | 0.456 $\pm$ 0.053 | 0.600 $\pm$ 0.053  |
| Talopyranose                     | 0.126 $\pm$ 0.016 | 0.163 $\pm$ 0.0001 |
| Mannopyranoside                  | 0.096 $\pm$ 0.008 | 0.127 $\pm$ 0.0002 |
| Galactopyranoside                | 0.227 $\pm$ 0.077 | 0.233 $\pm$ 0.055  |
| D-Allose                         | nd <sup>a</sup>   | 0.190 $\pm$ 0.027  |
| Sucrose                          | 0.194 $\pm$ 0.067 | 0.172 $\pm$ 0.013  |
| <b>Sugar alcohols</b>            |                   |                    |
|                                  | 0.125 $\pm$       |                    |
| Mannitol                         | 0.0003            | 0.114 $\pm$ 0.009  |
| Glycerol                         | 1.236 $\pm$ 0.086 | 0.997 $\pm$ 0.108  |
| Myo inositol                     | 1.889 $\pm$ 0.063 | 2.229 $\pm$ 0.347  |
| <b>Other organic substances</b>  |                   |                    |
| Aucubin                          | 1.735 $\pm$ 0.258 | 1.739 $\pm$ 0.519  |
| Gluconic acid, $\gamma$ -lactone | nd                | 0.171 $\pm$ 0.044  |
| Phosphoric acid                  | 2.160 $\pm$ 0.103 | 1.826 $\pm$ 0.175  |

|                       |                          |                             |
|-----------------------|--------------------------|-----------------------------|
| Urea                  | 0.460 ± 0.155            | nd                          |
| <b>Organic acids</b>  |                          |                             |
| Malic acid            | 0.923 ± 0.128<br>0.080 ± | 4.591 ± 0.189* <sup>b</sup> |
| Threonic acid         | 0.0002                   | 0.097 ± 0.006               |
| Erythronic acid       | 0.249 ± 0.018            | 0.350 ± 0.022*              |
| Glyceric acid         | 2.068 ± 0.569            | 5.721 ± 0.529*              |
| Octadecatrienoic acid | 0.088 ± 0.015<br>0.088 ± | 0.112 ± 0.002               |
| Arabinonic acid       | 0.0007                   | 0.103 ± 0.0001*             |
| Butanoic acid         | 0.170 ± 0.006            | 0.229 ± 0.005*              |
| Ribonic acid          | 0.239 ± 0.097            | 0.088 ± 0.010               |
| Gluconic acid         | 0.252 ± 0.177            | 0.109 ± 0.005               |
| Citric acid           | 0.302 ± 0.040            | 0.479 ± 0.096               |
| Hexadecanoic acid     | 0.098 ± 0.023            | nd                          |
| Linoleic acid         | 0.116 ± 0.018            | 0.117 ± 0.020               |
| <b>Amino acids</b>    |                          |                             |
| Alanine               | 0.653 ± 0.133            | 1.134 ± 0.120*              |
| Valine                | 0.247 ± 0.069            | 0.208 ± 0.018               |
| Citrulline            | 0.131 ± 0.024            | nd                          |
| Norleucine            | 0.221 ± 0.027            | 0.166 ± 0.023               |
| Glycine               | 0.140 ± 0.029            | 0.125 ± 0.015               |
| Oxoproline            | 0.126 ± 0.023            | 0.174 ± 0.025               |
| Serine                | 0.195 ± 0.052            | 0.133 ± 0.0001              |
| Proline               | 0.989 ± 0.215            | 0.586 ± 0.139               |
| Threonine             | 0.407 ± 0.103            | 0.379 ± 0.048               |
| Glutamic acid         | 1.425 ± 0.336            | 1.204 ± 0.121               |
| Aspartic acid         | 0.468 ± 0.088            | 0.573 ± 0.051               |

|                                   |               |               |
|-----------------------------------|---------------|---------------|
| Gamma-aminobutyric<br>acid (GABA) | 1.018 ± 0.146 | 0.853 ± 0.065 |
|-----------------------------------|---------------|---------------|

---

<sup>a</sup>nd stands for not detected

<sup>b</sup>Asterisks indicate values that differ significantly at each time point (pairwise t-test,  $P \leq 0.05$ )

**Table S5.** Metabolite amounts (means  $\pm$  SE) expressed as relative abundance based on the relative response compared to internal standard adonitol 48 h post application of *Bacillus subtilis* MBI600 (*Bs* MBI600).

| Substance                       | Control           | <i>Bs</i> MBI600                |
|---------------------------------|-------------------|---------------------------------|
| <b>Water-soluble sugars</b>     |                   |                                 |
| 4-Ketoglucose                   | 0.087 $\pm$ 0.013 | 0.084 $\pm$ 0.012               |
| Ribofuranose                    | 0.117 $\pm$ 0.034 | 0.065 $\pm$ 0.011               |
| Fructose                        | 0.629 $\pm$ 0.121 | 0.326 $\pm$ 0.020* <sup>b</sup> |
| Sorbose                         | 0.698 $\pm$ 0.050 | 0.389 $\pm$ 0.079*              |
| Galactose                       | nd <sup>a</sup>   | 0.036 $\pm$ 0.010               |
| Glucose                         | 2.973 $\pm$ 0.569 | 1.610 $\pm$ 0.104               |
| Mannose                         | 0.543 $\pm$ 0.066 | 0.310 $\pm$ 0.023*              |
| Talopyranose                    | 0.188 $\pm$ 0.024 | 0.097 $\pm$ 0.009*              |
| Xylopyranose                    | nd                | 0.150 $\pm$ 0.066               |
| Mannopyranoside                 | 0.146 $\pm$ 0.027 | 0.313 $\pm$ 0.205               |
| Galactopyranoside               | 0.302 $\pm$ 0.026 | 0.142 $\pm$ 0.019               |
| Ribose                          | 0.117 $\pm$ 0.020 | 0.075 $\pm$ 0.011               |
| D-Allose                        | 0.115 $\pm$ 0.082 | 0.107 $\pm$ 0.0001              |
| Allopyranose                    | 0.081 $\pm$ 0.010 | 0.045 $\pm$ 0.008*              |
| Sucrose                         | 0.433 $\pm$ 0.090 | 0.147 $\pm$ 0.042               |
| <b>Sugar alcohols</b>           |                   |                                 |
| Mannitol                        | 0.228 $\pm$ 0.017 | 0.110 $\pm$ 0.019*              |
| Glycerol                        | 1.143 $\pm$ 0.111 | 1.172 $\pm$ 0.103               |
| Myo inositol                    | 2.740 $\pm$ 0.349 | 1.270 $\pm$ 0.309*              |
| <b>Other organic substances</b> |                   |                                 |

|                                  |                   |                     |
|----------------------------------|-------------------|---------------------|
| Aucubin                          | $0.529 \pm 0.122$ | $0.154 \pm 0.083^*$ |
| Gluconic acid, $\gamma$ -lactone | nd                | $0.085 \pm 0.036$   |
| PhosphoricAcid                   | $1.908 \pm 0.199$ | $1.959 \pm 0.184$   |
| Urea                             | nd                | $0.171 \pm 0.031$   |

#### Organic acid

|                           |                   |                     |
|---------------------------|-------------------|---------------------|
| Malic acid                | $2.627 \pm 0.531$ | $5.011 \pm 0.518$   |
| Threonic acid             | $0.190 \pm 0.072$ | $0.074 \pm 0.003^*$ |
| Erythronic acid           | $0.276 \pm 0.024$ | $0.368 \pm 0.018^*$ |
| Glyceric acid             | nd                | $0.036 \pm 0.005$   |
| Octadecatrienoic acid     | $0.095 \pm 0.006$ | $0.082 \pm 0.010$   |
| Citric acid               | $0.302 \pm 0.040$ | $0.479 \pm 0.096$   |
| Arabinonic acid           | $0.066 \pm 0.013$ | $0.073 \pm 0.011$   |
|                           | $0.160 \pm$       |                     |
| Butanoic acid             | 0.0001            | $0.130 \pm 0.007^*$ |
| Ribonic acid              | $0.118 \pm 0.032$ | $0.116 \pm 0.010$   |
| DeoxyErythroPentonic acid | $0.187 \pm 0.040$ | $0.092 \pm 0.021$   |
| ButanedioicAcid           | $0.078 \pm 0.009$ | $0.109 \pm 0.009$   |
| Glyceric acid             | $2.070 \pm 0.583$ | $3.132 \pm 0.474$   |
| Butanoic acid             | nd                | $0.067 \pm 0.023$   |
| Gluconic acid             | $0.093 \pm 0.012$ | $0.048 \pm 0.005$   |
| Linoleic acid             | $0.227 \pm 0.070$ | $0.113 \pm 0.014$   |

#### Amino acids

|            |                   |                     |
|------------|-------------------|---------------------|
| Alanine    | $0.568 \pm 0.074$ | $0.896 \pm 0.119^*$ |
| Isoleucine | nd                | $0.078 \pm 0.013$   |
| Valine     | $0.232 \pm 0.032$ | $0.435 \pm 0.078^*$ |
| Citrulline | nd                | $0.043 \pm 0.007$   |
| Norleucine | $0.203 \pm 0.037$ | $0.357 \pm 0.063$   |

|                                   |               |                |
|-----------------------------------|---------------|----------------|
| Glycine                           | 0.098 ± 0.016 | 0.149 ± 0.026  |
| Oxoproline                        | 0.334 ± 0.084 | 0.249 ± 0.041  |
| Serine                            | 0.161 ± 0.019 | 0.093 ± 0.019* |
| Proline                           | 0.236 ± 0.045 | 0.330 ± 0.063  |
| Threonine                         | nd            | 0.037 ± 0.005  |
| Asparagine                        | 0.113 ± 0.023 | 0.100 ± 0.012  |
| Leucine                           | 0.204 ± 0.029 | 0.272 ± 0.042  |
| Glutamic acid                     | 0.500 ± 0.055 | 0.652 ± 0.100  |
| Aspartic acid                     | 1.177 ± 0.250 | 1.289 ± 0.208  |
| Gamma-aminobutyric acid<br>(GABA) | 0.522 ± 0.042 | 1.169 ± 0.091* |

<sup>a</sup>nd stands for not detected

<sup>b</sup>Asterisks indicate values that differ significantly at each time point (pairwise t-test,  $P \leq 0.05$ )
